# Supplementary material for: The CAR–mRNA Interaction Surface Is a Zipper Extension of the Ribosome A Site
Source: Int J Mol Sci. 2022 Jan 26;23(3):1417. doi: 10.3390/ijms23031417 (PMC8835751; doi:10.3390/ijms23031417)
Supplement: Supplementary file 1 [file ijms-23-01417-s001.zip › Dalgarno_code_Suppl.txt]

# This is the code appendix for the k-means and stacking geometry analysis.
# Code for analysis in Figures 5D, 8, and 9.

# For all other code, refer to previous publications:
# Scopino, K.; Dalgarno, C.; Nachmanoff, C.; Krizanc, D.; Thayer, K.M.; Weir, M.P. 
# Arginine Methylation Regulates Ribosome CAR Function. Int J Mol Sci 2021, 22, 1335. PMC7866298
# and
# Scopino, K.; Williams, E.; Elsayed, A.; Barr, W.A.; Krizanc, D.; Thayer, K.M.; Weir, M.P. 
# A Ribosome Interaction Surface Sensitive to mRNA GCN Periodicity Biomolecules 2020, 10, doi:10.3390/biom10060849. PMC7357141

#######################
# K-Means Calculation #
#######################

# This script performs the k-means calculation. It fits to backbone atoms,
# then calculates k-means for the backbone atoms of unrestrained residues.
# Run with cpptraj.

# input common atom prmtop file (bases of nt1 and nt2 of +1 codon stripped)
parm ../CLUST_FILES/5JUP_N2_NNU_nowat.prmtop

# input common atom reference file (bases of nt1 and nt2 of +1 codon stripped, energy minimized structure)
reference ../CLUST_FILES/5JUP_N2_GCU_CGU.rst

# input concatenated GCU/CGU trajectory (2 frames per ns)
trajin ../CLUST_FILES/5JUP_N2_GCU_CGU.trj

# fit to energy minimized reference structure (backbone atoms of all residues)
rms reference :1-494@N,CA,C,O,P,O5',O3',C5'

# perform k-means calculation (backbone atoms of unrestrained residues, ex. k=5)
cluster kmeans :2-5,13-16,23-31,46-51,65-73,75-76,88-104,122-141,164-175,184-195,197-198,222-223,230-246,256-269,288-289,320-330,346-362,370-389,401-415,420-430,444-452,461-468,480-489@N,CA,C,O,P,O5',O3',C5' mass clusters 5 maxit 1000 out cluster_out averagelinkage gracecolor summary summary_out info cluster_info repout centroid repfmt pdb clusterout cluster.nc clusterfmt netcdf

################
# K-Means RMSF #
################

# This script uses the most representative frame of the GCU cluster 
# (identified by k-means) as a reference and compares the concatenated 
# CGU cluster frames using the RMSF calculation. Run with cpptraj.

# input common atom prmtop file (bases of nt1 and nt2 of +1 codon stripped)
parm ../CLUST_FILES/5JUP_N2_NNU_nowat.prmtop

# input concatenated frames from CGU cluster to compare
trajin ../CLUST_FILES/5JUP_N2_CGU.trj

# RMS fit CGU frames to average GCU structure
average crdset ../CLUST_FILES/GCU_2448.rst
run
rms ref ../CLUST_FILES/GCU_2448.rst

# calculate RMSF of backbone atoms
rmsf out rmsf_bkbone.dat :1-494@N,CA,C,O,P,O5',O3',C5' byres

###############################
# Stacking Geomeetry Analysis #
###############################

#!/usr/bin/env python
# coding: utf-8

# In[ ]:


# Eric Sakkas - Weir Lab, Wesleyan University
# esakkas@wesleyan.edu

# This code takes a pdb file and identifies the +1G1 and +1C2 positions in the +1 codon.
# It then calculates the r, rho, and theta values at each frame of the dynamics analysis,
# as defined in the Bottaro paper, and exports these values to a .csv file. Run with python.

# What to change for individual analysis:
# - pdb = md.load(YOUR PDB FILE)
# - frame_num = NUMBER OF FRAMES IN THE PDB FILE (can use mdtraj library to count frames if unknown)
# - If looking at residues other than +1G1 and +1C2, change atom.residue.name = DESIRED RESIDUE
#   in the lists expl_G and expl_C

# In this example code, we analyze +1G1 and +1C2 positions in the +1 codon GCG. 

#load required libraries
import math
import csv
import mdtraj as md
from __future__ import print_function

#load pdb file
pdb = md.load('new_short_GCG_GC.pdb')
topology = pdb.topology

#declare the number of frames in the .pdb files
frame_num = 3230

#Creates a list of lists (easiest way to output) of the atomic index of C2, C4, and C6
#atoms in +1G1
expl_G = [
[atom.index for atom in topology.atoms if atom.name == 'C2' and atom.residue.name == 'G'],
[atom.index for atom in topology.atoms if atom.name == 'C4'and atom.residue.name == 'G'],
[atom.index for atom in topology.atoms if atom.name == 'C6'and atom.residue.name == 'G']
]
#print(expl_G)

#Creates a list of lists of the atomic index of C2, C4, and C6
#atoms in +1C2
expl_C = [
[atom.index for atom in topology.atoms if atom.name == 'C2' and atom.residue.name == 'C'],
[atom.index for atom in topology.atoms if atom.name == 'C4'and atom.residue.name == 'C'],
[atom.index for atom in topology.atoms if atom.name == 'C6'and atom.residue.name == 'C']
]
#print(expl_C)

#Create a list of all C2 locations (x,y,z) in +1G1 for each frame
frame_idx = 0
G_C2_List = []
while frame_idx < frame_num:
    G_C2_List += [tuple(pdb.xyz[frame_idx, expl_G[0][0],:])]
    frame_idx +=1
#print(G_C2_List)

#Create a list of all C4 locations (x,y,z) in +1G1 for each frame
frame_idx = 0
G_C4_List = []
while frame_idx <frame_num:
    G_C4_List += [tuple(pdb.xyz[frame_idx, expl_G[1][0],:])]
    frame_idx +=1
#print(G_C4_List)

#Create a list of all C6 locations (x,y,z) in +1G1 for each frame
frame_idx = 0
G_C6_List = []
while frame_idx <frame_num:
    G_C6_List += [tuple(pdb.xyz[frame_idx, expl_G[2][0],:])]
    frame_idx +=1
#print(G_C6_List)

#Create a list of all C2 locations (x,y,z) in +1C2 for each frame
frame_idx = 0
C_C2_List = []
while frame_idx <frame_num:
    C_C2_List += [tuple(pdb.xyz[frame_idx, expl_C[0][0],:])]
    frame_idx +=1
#print(G_C2_List)

#Create a list of all C4 locations (x,y,z) in +1C2 for each frame
frame_idx = 0
C_C4_List = []
while frame_idx <frame_num:
    C_C4_List += [tuple(pdb.xyz[frame_idx, expl_C[1][0],:])]
    frame_idx +=1
#print(G_C4_List)

#Create a list of all C6 locations (x,y,z) in +1C2 for each frame
frame_idx = 0
C_C6_List = []
while frame_idx <frame_num:
    C_C6_List += [tuple(pdb.xyz[frame_idx, expl_C[2][0],:])]
    frame_idx +=1
#print(G_C6_List)

def center(a, b, c):
    '''
    Takes in three tuples generated using the pdb.xyz method and finds their center. Works 
    with three points that make up an equilateral triangle (like those within a 
    hexagon). 
    
    Example: find the center of the rings in +1G1 and +1G2.
    
    Inputs: three tuples with (x,y,z) coordinates each. 
    Output: one tuple with (x,y,z) coordinates at the center of the three input points.
    '''
    midpoint = ((a[0]+b[0]+c[0])/3,(a[1]+b[1]+c[1])/3,(a[2]+b[2]+c[2])/3)
    return midpoint

# Create a list of midpoints (with x,y,z coord.) of C2,C4,C6 in the +1G1 residue at each frame
i = 0
G_mid_list = []
while i <frame_num:
    G_mid_list += [center(G_C2_List[i],G_C4_List[i],G_C6_List[i])]
    i += 1
#print(G_mid_list)

# Create a list of midpoints of C2,C4,C6 in the +1C2 residue at each frame
i = 0
C_mid_list = []
while i <frame_num:
    C_mid_list += [center(C_C2_List[i],C_C4_List[i],C_C6_List[i])]
    i += 1
#print(G_mid_list)

def base(frame):
    '''
    Takes a frame (indexed at 0) and outputs a list of the C2,C4,C6, and midpoint locations
    (each tuples of x,y,z), of the +1G1 residue at that frame. Will be useful
    for later code.
    
    Input: int frame index 0
    Output: list of 4 tuples; structure:[C2 location,C4 location,C6 location,midpoint location]
    '''
    lst = [G_C2_List[frame], G_C4_List[frame], G_C6_List[frame], G_mid_list[frame]]
    return lst

def cross(a, b):
    '''
    Calculates the cross product of 2 vectors, which is the unit vector that is 
    perpendicular to both vectors.
    
    Input: 2 tuples with x,y,z parameters
    Output: 1 tuple with x,y,z parameters that is perpendicular from the inputs, translated
            to be at the origin.
    '''
    c = (a[1]*b[2] - a[2]*b[1],
         a[2]*b[0] - a[0]*b[2],
         a[0]*b[1] - a[1]*b[0])
    return c

def proj(a, b):
    '''
    Calculates the projection of a vector a onto vector b.
    
    Input: 2 tuples with x,y,z parameters
    Output: 1 tuple with x,y,z parameters that is proj_b(a), translated
            to be at the origin.
    '''
    #first calculate dot product of a and b
    a_dot_b = a[0]*b[0]+a[1]*b[1]+a[2]*b[2]
    
    #next calc. the magnitude of b
    b_dist = math.sqrt(b[0]**2+b[1]**2+b[2]**2)
    
    #finally, the projection:
    #sc for scalar
    sc = a_dot_b/(b_dist**2)
    proj = (sc*b[0],sc*b[1],sc*b[2])
    return proj
    
def values(base,b):
    '''
    Calculates the r, rho, and theta values as expressed in the Bottaro paper:
    
    Inputs: -base is a list created by the base funtion above. It contains the location 
            of a base's C2,C4,C6, and midpoint in a single 4-tuple list.
            -b is one tuple of (x,y,z) coordinates for a point
    Output: a list containing 3 floats; structure: [r_dist, rho_dist, theta]
    '''
    # r is the distance between the center of 2 bases. We can get r by imagining
    # the two base centers as vectors in R^3 space and subtracting the two to 
    # get an r vector from the origin:
    #r = (base[3][0]-b[0],base[3][1]-b[1],base[3][2]-b[2])
    r = (b[0]-base[3][0],b[1]-base[3][1],b[2]-base[3][2])
    #we also get the length of r to return in the outputed list
    r_dist = math.sqrt(r[0]**2+r[1]**2+r[2]**2)
    
    #calculating rho requires multivariable calculus. First, we create the plane defined
    # by 2 vectors, from the midpoint to C2 and from midpoint to C4. This is the plane
    # of the base 
    #2 vectors from the midpoint to C2 and C4
    v1 = (base[0][0]-base[3][0],base[0][1]-base[3][1],base[0][2]-base[3][2])
    v2 = (base[1][0]-base[3][0],base[1][1]-base[3][1],base[1][2]-base[3][2])    

    #cross product of these two vectors:
    css = cross(v1,v2)
    
    #the cross product of the css vector and v1 vector gives us a y-coordinate-axis
    # we will use this later to assure that we are taking the correct theta value
    y_coord = cross(v1,css)
    
    # rho is the projection of r onto the plane defined by the two vectors above. To
    # calculate this projection:
    
    #we begin by finding the projection of r onto the normal vector to the plane (normal vector = css)
    pj = proj(r,css)
    
    #we subtract this projection from r to get rho:
    rho = (r[0]-pj[0],r[1]-pj[1],r[2]-pj[2])
    #calc. the magintude of rho as well:
    rho_dist = math.sqrt(rho[0]**2+rho[1]**2+rho[2]**2)
    
    #finally, we calculate theta:
    dot_prod = v1[0]*rho[0]+v1[1]*rho[1]+v1[2]*rho[2]
    denom = math.sqrt(v1[0]**2+v1[1]**2+v1[2]**2)*math.sqrt(rho[0]**2+rho[1]**2+rho[2]**2)
    cos_theta = dot_prod/denom
    theta = math.degrees(math.acos(cos_theta))
    
    # to assure that we get the correct theta, we project rho onto the y-coord of the plane axes
    # to see if y is "positive" or "negative". If y is positive we take the theta value as is. If
    # y is negative theta becomes 360-theta
    proj_y_rho = proj(rho,y_coord)
    #used to make sure that all scales are the same, as they should be:
    #scaler0 = proj_y_rho[0]/y_coord[0]
    #scaler1 = proj_y_rho[1]/y_coord[1]
    #scaler2 = proj_y_rho[2]/y_coord[2]
    #the scalar tells us if rho was facing the same direction or opposite direction of y
    scaler = proj_y_rho[0]/y_coord[0]
    #if they are facing in opposite directions (the y value is negative), then we want 360-theta
    if scaler <0:
        theta = 360-theta
    output = [r_dist,rho_dist,theta]
    return output
    
#Create csv file with 4 columns (fields) and a row for every frame
fields = ['frame','r_dist','rho_dist', 'theta']
rows=[]
i = 0
while i <frame_num:
    bse = base(i)
    vals = values(bse,C_mid_list[i])
    row = [i]+vals
    rows.append(row)
    i+=1

filename = "GCG_GC_plot.csv"
with open(filename, 'w') as csvfile:
    csvwriter = csv.writer(csvfile) 
    csvwriter.writerow(fields) 
    csvwriter.writerows(rows)
